# Supplementary material for: Circulating Cytokines Reflect the Etiology-Specific Immune Environment in Cirrhosis and HCC
Source: MDPI journal article supplement (doi:10.3390/cancers14194900), 2022-10-07
Supplement: s1 [file s1]

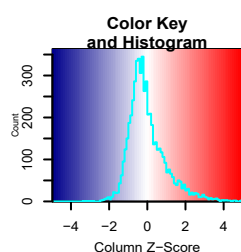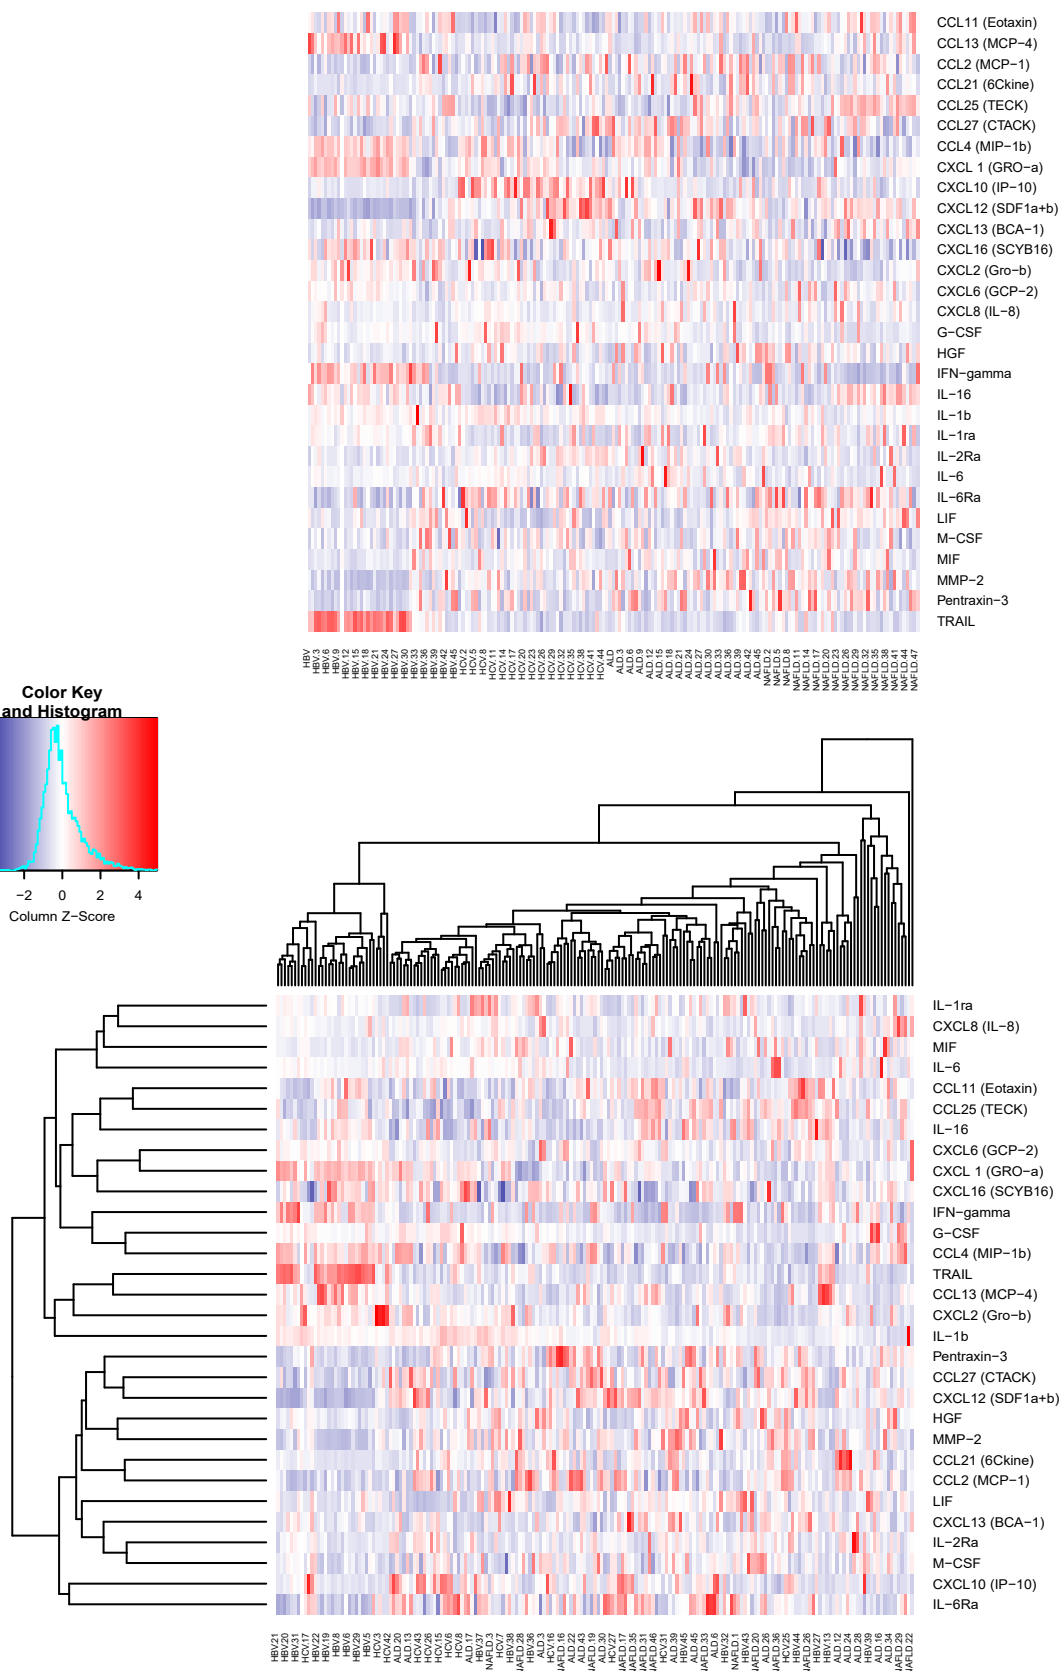

Supplementary Figure S3. Heatmaps depicting z-scores of selected serum cytokines across patients with HBV-, HCV-, ALD- and NAFLD-cirrhosis. Scaling was conducted per cytokine (row) using the mean pathway score. Positive and negative z-scores in (A) and (B) heatmaps are colored in gradients of red and blue, respectively. Heatmaps are depicted with (A) and without (B) two-way clustering. Abbreviations: Hepatitis B virus (HBV), hepatitis C virus (HCV), Alcoholic liver disease (ALD), non-alcoholic fatty liver disease (NAFLD)
