# Supplementary material for: Circulating Cytokines Reflect the Etiology-Specific Immune Environment in Cirrhosis and HCC
Source: MDPI journal article supplement (doi:10.3390/cancers14194900), 2022-10-07
Supplement: s1 [file s1]

| Cytokine             |         | HBV-associated cirrhosis |                      | HCV-associated cirrhosis |                     | ALD-associated cirrhosis |                        | NAFLD-associated cirrhosis |                      | Healthy control |                    |          |
|----------------------|---------|--------------------------|----------------------|--------------------------|---------------------|--------------------------|------------------------|----------------------------|----------------------|-----------------|--------------------|----------|
|                      | LLOD    | Median                   | IQR                  | Median                   | IQR                 | Median                   | IQR                    | Median                     | IQR                  | Median          | IQR                | P-value  |
| CCL1 (I-309)         | 6.95    | 53.86                    | 36.0825-98.52        | 43.86                    | 29.16-65.54         | 55.635                   | 39.29-76.9925          | 53.695                     | 35.01-67.985         | 57.78           | 44.53-84.77        | 0.050216 |
| CCL11 (Eotaxin)      | 7.87    | 102.61                   | 72.935-131.1925      | 72.54                    | 55.71-99.31         | 93.295                   | 71.515-126.0825        | 117.21                     | 89.605-135.9525      | 85.04           | 75.59-113.93       | 0.000133 |
| CCL13 (MCP-4)        | 0.55    | 77.225                   | 34.4525-164.92       | 34.11                    | 15.98-55.83         | 38.8                     | 21.04-61.7725          | 53.59                      | 18.8675-89.2375      | 38.57           | 24.67-62.21        | 0.000161 |
| CCL15 (MIP-1d)       | 2.4     | 6246.425                 | 3979.2375-8910.4825  | 5871.9                   | 3953.68-7699.11     | 5037.08                  | 3096.2325-7318.075     | 4947.705                   | 3531.4375-5773.39    | 3037.58         | 2124.89-3900.84    | <0.0001  |
| CCL17 (TARC)         | 4.09    | 178.07                   | 79.8625-343.38       | 74.3                     | 51.57-141.02        | 138.675                  | 57.9025-233.985        | 69.84                      | 20.12-191.605        | 134.06          | 64.24-195.39       | 0.017858 |
| CCL2 (MCP-1)         | 0.44    | 45.89                    | 28.9875-58.74        | 64.02                    | 40.39-95.15         | 84.13                    | 54.51-126.9875         | 78.025                     | 52.0525-106.4375     | 122.46          | 95.64-145.53       | <0.0001  |
| CCL21 (6Ckine)       | 169.83  | 5863.155                 | 4508.7725-12126.3225 | 14505.86                 | 6522.24-30735.68    | 24665.09                 | 8988.4825-53738.1275   | 21921.35                   | 14059.445-33214.4775 | 51140.62        | 19530.69-71237.58  | <0.0001  |
| CCL22 (MDC)          | 2.385   | 851.05                   | 437.0875-1108.1225   | 636.09                   | 455.82-796.81       | 585.345                  | 300.8275-882.625       | 469.575                    | 355.1975-707.675     | 526.25          | 331.85-700.18      | 0.013222 |
| CCL23 (MPIF-1)       | 3.79    | 540.065                  | 144.13-782.8         | 514.54                   | 288.07-778.71       | 589.935                  | 379.3375-850.0325      | 637.085                    | 330.56-925.265       | 410.85          | 294.59-611.92      | 0.420535 |
| CCL24 (Eotaxin-2)    | 5.705   | 616.39                   | 322.28-1041.7225     | 388.18                   | 247.43-757.38       | 579.695                  | 284.575-1129.175       | 714.12                     | 388.915-1164.89      | 273.41          | 149-463.06         | <0.0001  |
| CCL25 (TECK)         | 40.11   | 681.345                  | 510.61-1059.92       | 504.16                   | 365.51-676.97       | 650.725                  | 507.1075-1049.82       | 984.84                     | 726.35-1248.9225     | 586.45          | 389.24-676.97      | <0.0001  |
| CCL26 (Eotaxin-3)    | 3.32    | 16.735                   | 5.925-30.6575        | 15.58                    | 1.635-24.76         | 19.96                    | 1.65375-27.915         | 21.035                     | 13.82-30.01          | 24.76           | 16.22-31.94        | 0.024141 |
| CCL27 (CTACK)        | 2.085   | 1032.49                  | 722.01-1446.31       | 1474.24                  | 1062.65-1806.41     | 1767.34                  | 1359.4325-2647.42      | 1547.87                    | 1043.4175-2407.48    | 1110.62         | 840.36-1305.08     | <0.0001  |
| CCL3 (MIP-1a)        | 0.155   | 4.94                     | 3.765-7.03           | 4.8                      | 3.17-6.46           | 6.86                     | 4.31-11.6325           | 5.13                       | 3.3925-7.85          | 2.28            | 1.64-4.09          | <0.0001  |
| CCL4 (MIP-1b)        | 3.69    | 231.78                   | 182.105-256.74       | 195.67                   | 154.4-218.14        | 208.2                    | 154.995-250.625        | 191.04                     | 157.425-213.5325     | 202.59          | 181.78-217.02      | 0.006367 |
| CCL5 (RANTES)        | 1.67    | 11795.67                 | 4413.955-18177.26    | 8010.35                  | 5063.66-11200.32    | 7576.145                 | 3317.025-14295.5       | 7581.225                   | 3224.5975-12481.24   | 9171.56         | 6624.11-10282.52   | 0.221193 |
| CCL8 (MCP-2)         | 0.25    | 89.815                   | 52.5-126.965         | 63.47                    | 43.34-94.09         | 81.805                   | 41.305-114.015         | 67.635                     | 43.8175-101.625      | 67.91           | 46.64-118.84       | 0.159125 |
| CX3CL1 (Fractalkine) | 3.88    | 365.315                  | 241.7-478.8725       | 294.8                    | 211.57-397.8        | 356.835                  | 284.9975-620.8175      | 320.955                    | 208.205-438          | 140.26          | 114.04-274.15      | <0.0001  |
| CXCL 1 (GRO-a)       | 19.25   | 1196.89                  | 809.63-1331.92       | 787.9                    | 586.38-920.25       | 724.715                  | 515.075-915.9475       | 678.22                     | 535.015-857.715      | 775.59          | 596.79-906.09      | <0.0001  |
| CXCL10 (IP-10)       | 11.13   | 467.03                   | 291.45-680.01        | 1730.81                  | 1069.87-2779.23     | 895.35                   | 505.26-1452.675        | 916.91                     | 467.865-1262.7325    | 313.46          | 233.66-488.73      | <0.0001  |
| CXCL11 (I-TAC)       | 0.38    | 10.76                    | 4.4425-20.3725       | 14.54                    | 7.09-35.98          | 10.67                    | 5.135-22.9525          | 7.295                      | 2.67-17.8825         | 9               | 5.44-12.93         | 0.024214 |
| CXCL12 (SDF1a+b)     | 19.935  | 743.9                    | 452.0325-1054.4325   | 1976.75                  | 1456.4-2954.02      | 2224.83                  | 1772.585-2707.6325     | 2293.92                    | 1605.08-2649.6175    | 1913.29         | 1228.84-2658.01    | <0.0001  |
| CXCL13 (BCA-1)       | 1.56    | 27.935                   | 14.7175-48.955       | 43.02                    | 24.7-66.3           | 39.15                    | 20.8375-104.06         | 71.02                      | 33.395-99.525        | 23              | 13.62-55.16        | <0.0001  |
| CXCL16 (SCYB16)      | 1.5     | 729.445                  | 554.825-968.79       | 583.51                   | 508.03-799.85       | 715.325                  | 563.21-823.7575        | 561.895                    | 407.6325-713.505     | 580.7           | 524.35-702.8       | 0.003716 |
| CXCL2 (Gro-b)        | 21.3    | 345.91                   | 193.8075-544.62      | 188.53                   | 149.22-328.23       | 262.035                  | 111.165-489.955        | 172.8                      | 78.27-298.3375       | 403.59          | 235.18-633.17      | <0.0001  |
| CXCL5 (ENA-78)       | 232.09  | 1360.12                  | 1000.0775-1908.1675  | 1298.73                  | 432-2189.62         | 1638.82                  | 864.27-2557.71         | 1647.65                    | 1058.81-2299.1225    | 1618.55         | 567.69-2424.87     | 0.088037 |
| CXCL6 (GCP-2)        | 5.635   | 81.61                    | 50.9775-109.85       | 60.51                    | 24.16-86.12         | 80.035                   | 42.93-124.455          | 85.105                     | 63.39-160.9975       | 31.86           | 5.77-76.53         | <0.0001  |
| CXCL8 (IL-8)         | 1.4     | 20.18                    | 15.12-45.35          | 27.49                    | 16.37-42.37         | 60.995                   | 39.4675-117.525        | 61.63                      | 37.57-107.67         | 1.295           | 1.295-8.74         | <0.0001  |
| CXCL9 (MIG)          | 3.45    | 67.865                   | 48.795-105.955       | 64.1                     | 45.5-143.02         | 88.245                   | 65.1875-148.535        | 63.675                     | 45.63-106.5125       | 54.77           | 42.8-80.87         | 0.019118 |
| G-CSF                | 3.6     | 108.06                   | 79.5-174.135         | 161.07                   | 107.3-216.72        | 206.695                  | 136.22-378.355         | 108.44                     | 53.17-223.1925       | 58.26           | 29.28-118.24       | <0.0001  |
| HGF                  | 47.06   | 1042.43                  | 742.47-1480.045      | 1062.85                  | 819.67-1543.87      | 1666.12                  | 799.2525-3051.9175     | 2016.64                    | 1124.7125-2751.2075  | 271.07          | 47.06-442.84       | <0.0001  |
| IFN-γ                | 0.35    | 9.37                     | 4.565-13.1           | 0.53                     | 0.53-2.375          | 2.375                    | 0.53-6.23              | 0.74                       | 0.175-6.65           | 0.53            | 0.485-2.375        | <0.0001  |
| IL-16                | 6.69    | 275.545                  | 199.98-354.0225      | 154.42                   | 102.09-212.7        | 203.05                   | 149.4125-259.5725      | 335.09                     | 197.26-473.76        | 126.45          | 101.12-238.75      | <0.0001  |
| IL-18                | 1.76    | 77.71                    | 51.935-106.6         | 89.06                    | 64.02-146.99        | 80.65                    | 59.88-115.1425         | 87.785                     | 64.665-149.09        | 53.33           | 35.15-63.1         | <0.0001  |
| IL-1b                | 0.54    | 2.215                    | 0.54-3.98            | 0.54                     | 0.49-4.52           | 1.395                    | 0.49-3.705             | 2.96                       | 2.18-4.63            | 0.54            | 0.49-3.58          | 0.002234 |
| IL-1ra               | 72.65   | 635.975                  | 469.1875-899.8625    | 72.455                   | 72.455-673.2        | 621.6                    | 72.455-1071.155        | 854.12                     | 553.87-1140.49       | 72.455          | 66.53-72.65        | <0.0001  |
| IL-2Ra               | 4.78    | 107                      | 78.23-153.345        | 142.47                   | 110.61-199.67       | 172.28                   | 113.2725-257.0975      | 143.115                    | 101.55-208.665       | 62.21           | 35.94-82.7         | <0.0001  |
| IL-4                 | 6.38    | 0.4                      | 0.4-6.28             | 9.85                     | 7.62-13.1           | 12.76                    | 8.73-18.8125           | 7.315                      | 5.41-9.12            | 0.52            | 0.48-7.83          | <0.0001  |
| IL-6                 | 1.78    | 2.1                      | 1.6-4.1              | 3.55                     | 2.35-6.525          | 14.65                    | 7.4-40.2               | 5.55                       | 3.4-12.725           | 1.7             | 1.3-2.6            | <0.0001  |
| IL-6Ra               | 36.33   | 39898.44                 | 24894.47-57772.115   | 61226.41                 | 49158.4-73956.32    | 56471.865                | 42176.555-71559.1625   | 71324.735                  | 56378.24-88766.0925  | 29211.21        | 23844.06-36910.82  | <0.0001  |
| LIF                  | 10.58   | 74.74                    | 7.5-126.7075         | 10.58                    | 10.255-120.77       | 89.635                   | 10.49875-130.56        | 139                        | 116.41-186.765       | 10.255          | 10.255-10.58       | <0.0001  |
| M-CSF                | 1.595   | 41.39                    | 27.01-52.825         | 42.61                    | 29.56-58.94         | 52.385                   | 33.7325-70.2025        | 56.13                      | 41.555-74.23         | 21.6            | 16.13-33.45        | <0.0001  |
| MIF                  | 74.5    | 3696.175                 | 2038.605-7954.9325   | 5697.29                  | 3470.67-11336.72    | 10398.88                 | 5223.6975-20191.7875   | 11501.095                  | 7097.165-23331.5875  | 8016.67         | 5330.09-11815.36   | <0.0001  |
| MMP-2                | 396.915 | 4480.37                  | 400-38350.8          | 38931.58                 | 30407.85-53589.08   | 59412.725                | 41176.6525-110854.5425 | 57560.7                    | 43470.115-96849.9775 | 12517.56        | 7675.91-15695.29   | <0.0001  |
| MMP-3                | 506.75  | 28116.08                 | 19741.89-47049.275   | 24036.32                 | 15910.67-31849.81   | 21252.61                 | 12812.1725-33947.7725  | 19293.665                  | 13058.565-37536.6525 | 9643.19         | 5186.17-13101.55   | <0.0001  |
| PDGF-bb              | 21.955  | 1936.81                  | 1405.32-2845.105     | 1967.81                  | 1270.34-3168.39     | 1659.85                  | 968.16-2479.0675       | 1302.65                    | 952.9975-2111.77     | 1313.78         | 1022.71-1958.03    | 0.008319 |
| Pentraxin-3          | 61.785  | 17541.88                 | 10702.745-26164.335  | 23340.57                 | 17739.01-32094.79   | 38420.495                | 23633.1375-60186.8625  | 43932.96                   | 35651.935-63985.915  | 11086.81        | 8550.62-17811.11   | <0.0001  |
| SCF                  | 3.185   | 104.98                   | 73.145-147.24        | 100.12                   | 69.34-126.42        | 126.42                   | 91.4675-180.125        | 111.065                    | 86.705-153.46        | 64.51           | 51.07-90.93        | <0.0001  |
| SCGF-b               | 250.12  | 251862.97                | 206562.61-291861.685 | 269894.48                | 191924.98-340055.33 | 284888.955               | 197492.535-336058.2325 | 211424.57                  | 166061.715-273526.39 | 170910          | 131994.4-193133.07 | <0.0001  |
| TNF-a                | 3.235   | 34.52                    | 26.55-48.31          | 39.76                    | 26.77-53.02         | 38.7                     | 32.26-55.1             | 32.87                      | 20.1175-42.6425      | 37.92           | 27.51-46.42        | 0.185815 |
| TNF-b                | 9.315   | 468.21                   | 400.315-534.695      | 450.1                    | 267.05-602.57       | 462.56                   | 247.785-714.6425       | 402.82                     | 306.51-537.14        | 601.13          | 354.77-682.07      | 0.045999 |
| TRAIL                | 0.985   | 100.97                   | 62.37-132.93         | 35.04                    | 26.91-39.41         | 36.85                    | 28.67-41.48            | 47.355                     | 34.61-53.4975        | 27.6            | 22.3-31.75         | <0.0001  |
| VEGF                 | 38.635  | 36.35                    | 15-45                | 38.34                    | 38.34-38.635        | 38.34                    | 36.35-38.635           | 36.35                      | 11.215-94.4          | 38.34           | 7.405-38.635       | 0.252811 |
|                      |         |                          |                      |                          |                     |                          |                        |                            |                      |                 |                    |          |

Supplementary Table S2. Median serum levels of 53 cytokines, with corresponding lower limit of detection (LLOD), in patients with hepatitis B virus (HBV)-associated cirrhosis, hepatitis C virus (HCV)-associated cirrhosis, alcoholic liver disease (ALD)-associated cirrhosis, non-alcoholic fatty liver disease (NAFLD)-associated cirrhosis and healthy controls. P-values <.05 represent statistically significant cytokine differences between groups (based on Kruskal-Wallis test with Bonferroni assessment).
