# Supplementary material for: Circulating Cytokines Reflect the Etiology-Specific Immune Environment in Cirrhosis and HCC
Source: MDPI journal article supplement (doi:10.3390/cancers14194900), 2022-10-07
Supplement: s1 [file s1]

| Type of marker      | Type of panel   | Status       | Lower limit of quotation (pg/mL) |
|---------------------|-----------------|--------------|----------------------------------|
| <b>b-NGF</b>        | Cytokine panel  | Undetectable | 0.9                              |
| <b>GM-CSF</b>       | Chemokine panel | Undetectable | 2.15                             |
| <b>IFN-a2</b>       | Cytokine panel  | Undetectable | 7.715                            |
| <b>IL-10</b>        | Chemokine panel | Undetectable | 2.48                             |
| <b>IL-12(p40)</b>   | Cytokine panel  | Undetectable | 44.27                            |
| <b>IL-12(p70)</b>   | Cytokine panel  | Undetectable | 2.46                             |
| <b>IL-13</b>        | Cytokine panel  | Undetectable | 0.665                            |
| <b>IL-15</b>        | Cytokine panel  | Undetectable | 36.9                             |
| <b>IL-17A</b>       | Cytokine panel  | Undetectable | 2.58                             |
| <b>IL-1a</b>        | Cytokine panel  | Undetectable | 4.265                            |
| <b>IL-2</b>         | Cytokine panel  | Undetectable | 1.45                             |
| <b>IL-3</b>         | Cytokine panel  | Undetectable | 0.23                             |
| <b>IL-5</b>         | Cytokine panel  | Undetectable | 9.495                            |
| <b>IL-7</b>         | Cytokine panel  | Undetectable | 13.745                           |
| <b>CCL7 (MCP-3)</b> | Cytokine panel  | Undetectable | 5.64                             |
| <b>MIP-3a/CCL20</b> | Chemokine panel | Undetectable | 0.35                             |

Supplementary Table S1. Overview of undetectable cytokines with observed lower limit of detection.
