# Supplementary material for: Circulating Cytokines Reflect the Etiology-Specific Immune Environment in Cirrhosis and HCC
Source: MDPI journal article supplement (doi:10.3390/cancers14194900), 2022-10-07
Supplement: s1 [file s1]

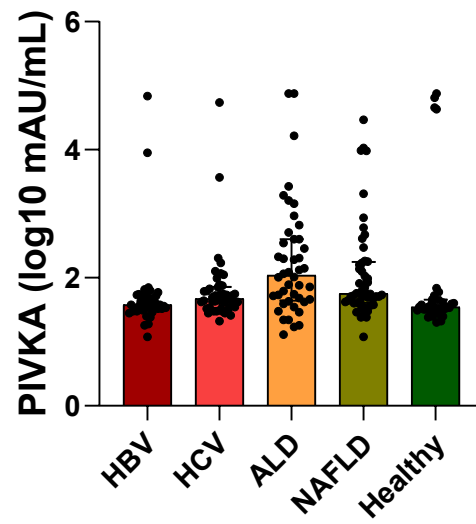

Supplementary Figure S2. Scatter dot plots with serum PIVKA-II (DCP) levels in HBV-cirrhosis, HCV-cirrhosis, ALD-cirrhosis and NAFLD-cirrhosis. The data was corrected for multiple comparisons using the Bonferroni method.
