# Supplementary material for: Circulating Cytokines Reflect the Etiology-Specific Immune Environment in Cirrhosis and HCC
Source: MDPI journal article supplement (doi:10.3390/cancers14194900), 2022-10-07
Supplement: s1 [file s1]

Cirrhosis markers

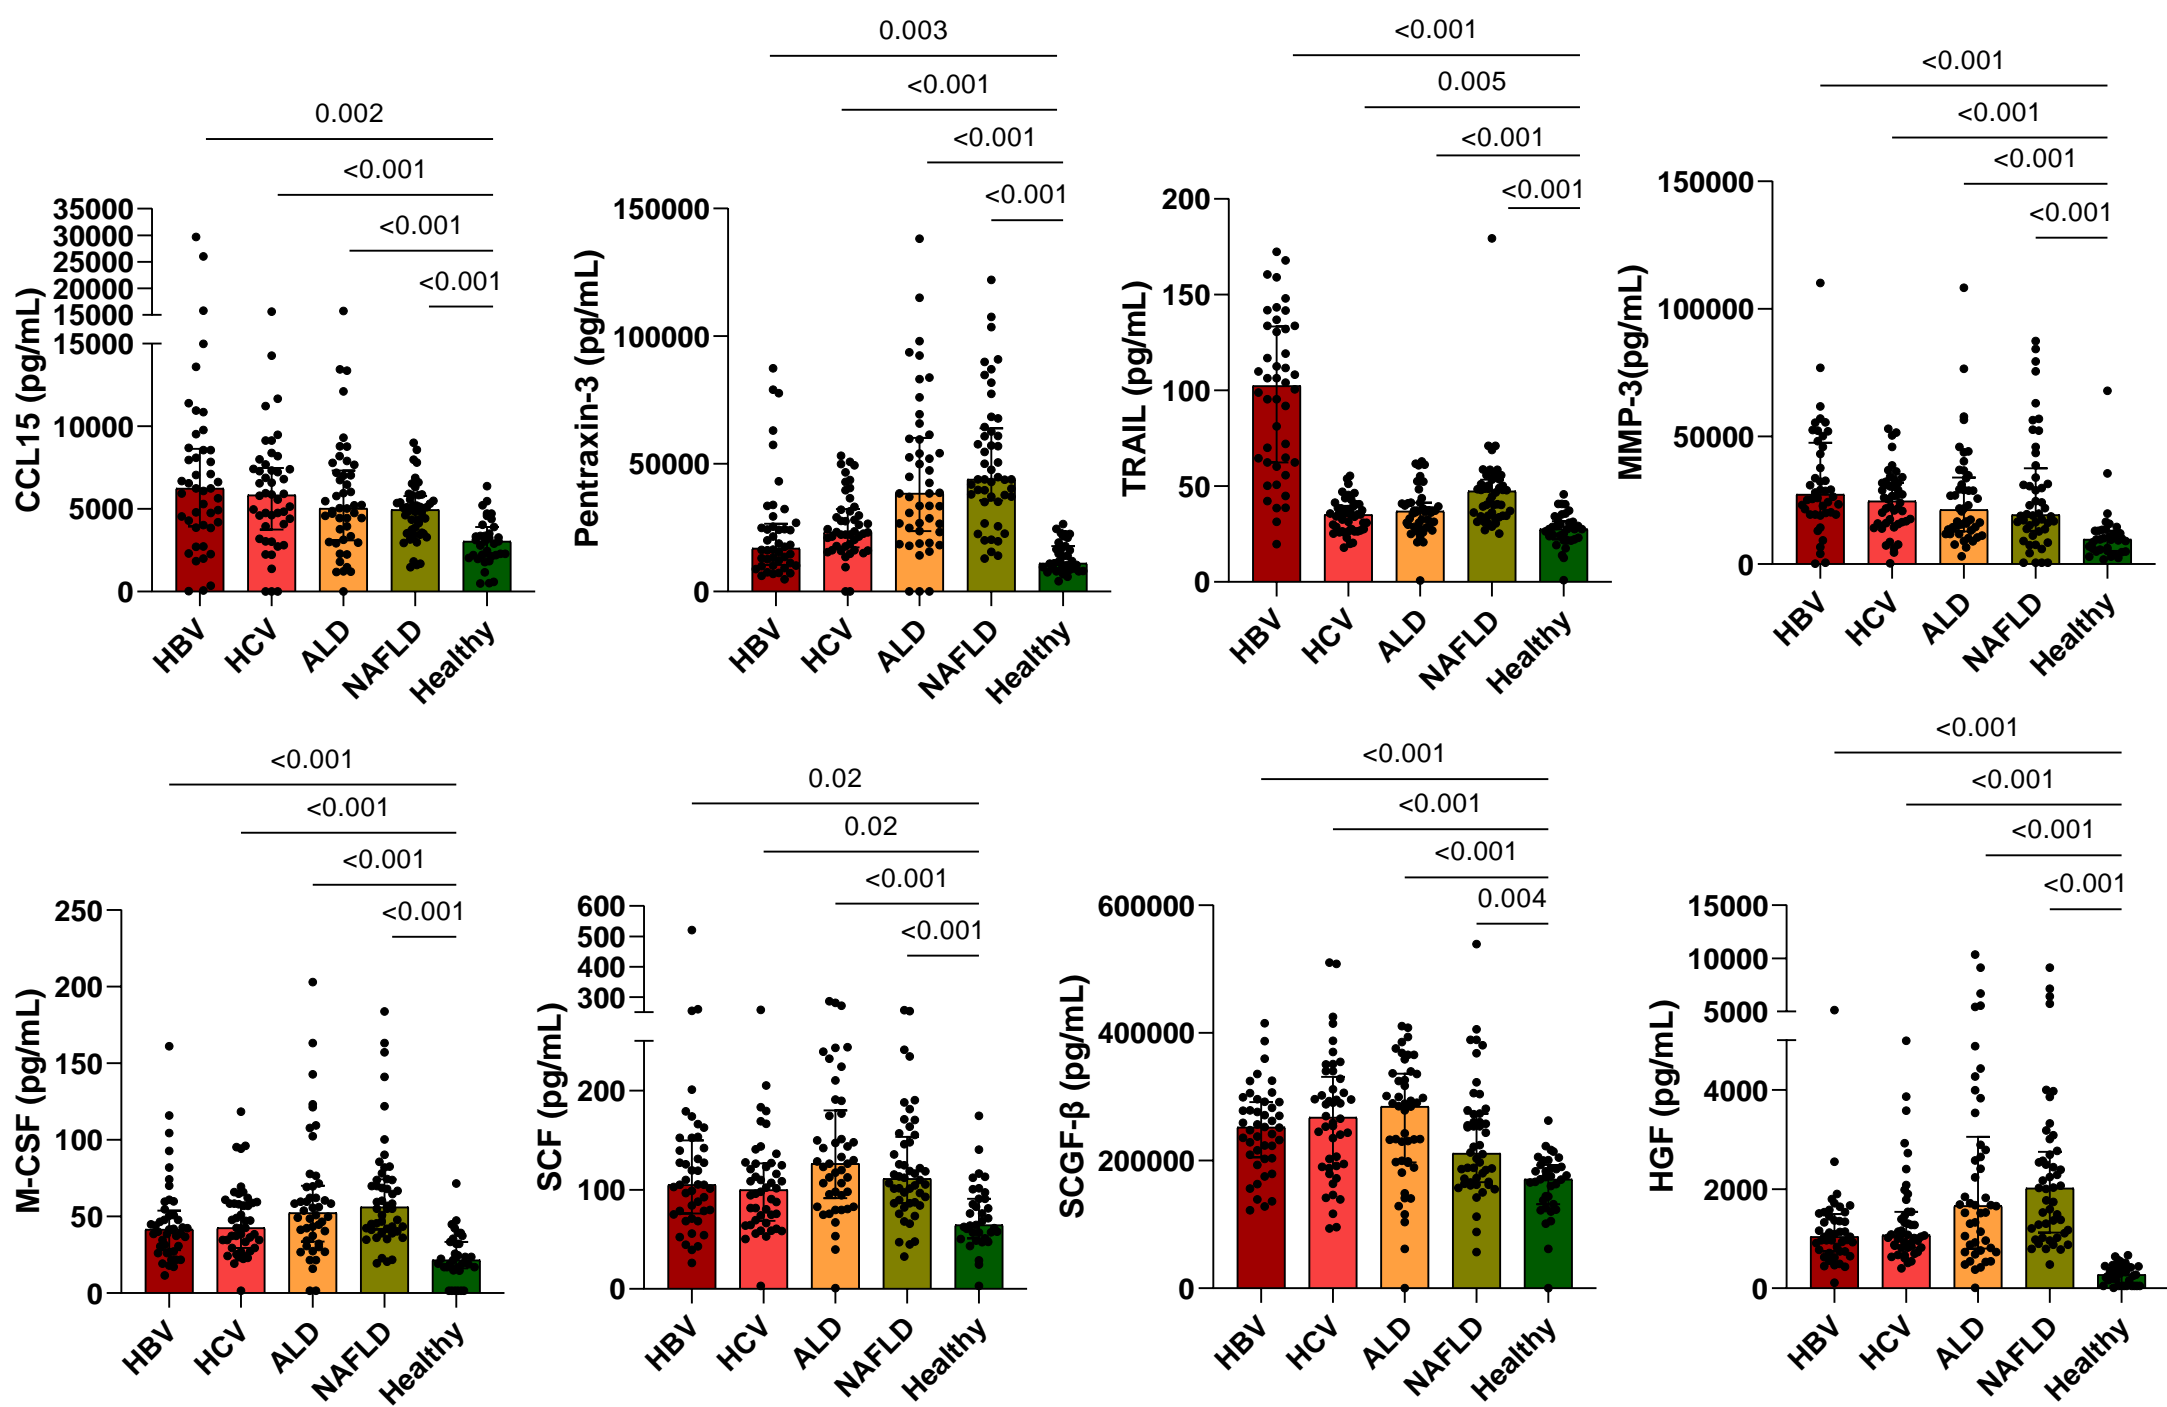

Supplementary Figure S1. Cirrhosis markers, associated with inflammation and tumor growth
